# Supplementary material for: From Laboratory to Field: Enhancing Solar Evaporation Performance through Advanced Thermal Management
Source: Research Square preprint supplement (doi:10.21203/rs.3.rs-6929863/v1), 2025-06-25
Supplement: Supplementary file 1 [file 6150f27578a23c429cdac57f.docx]

Supplementary Information

**From Laboratory to Field: Enhancing Solar Evaporation Performance through Advanced Thermal Management**

Chang-ting Wang1 2 3, Canjie Lin1 3, Kai Xu 4 5, Yang Liu1 2 3, Zhongtao Lao1 3, Jianping Cao1 3 6, Bei Liu1 3, Amal Baqais7, Khaled Bin Bandar8, Saud Aldrees9, Mohammed A. Alhussaini8,Shao-Yuan Leu2 *, NorEddine Ghaffour10, Qiaoqiang Gan4 5, Wenbin Wang1 3 *, Peng Wang1 3 *

1. School of Environmental Science and Engineering, Sun Yat-sen University, Guangzhou 510006, China
2. Department of Civil and Environmental Engineering, The Hong Kong Polytechnic University, Hong Kong SAR, China
3. Institute of Carbon Neutrality and Green Development, Sun Yat-sen University, Guangzhou 510006, China
4. Materials Science Engineering, Physical Sciences and Engineering Division, King Abdullah University of Science and Technology, Thuwal 23955-6900, Saudi Arabia
5. Center for Renewable Energy & Storage Technologies (CREST), King Abdullah University of Science and Technology, Thuwal 23955-6900, Saudi Arabia
6. Southern Marine Science and Engineering Guangdong Laboratory (Zhuhai), Zhuhai 519082, China
7. Department of Chemistry, College of Science, Princess Nourah bint Abdulrahman University, Riyadh 11671, Saudi Arabia
8. Institute for Water Management and Treatment, King Abdulaziz City for Science and Technology, Riyadh 11442, Saudi Arabia
9. Desalination Technologies Institute, King Abdulaziz City for Science and Technology, Riyadh 11442, Saudi Arabia
10. Environmental Science and Engineering, Biological and Environmental Science and Engineering Division, King Abdullah University of Science and Technology, Thuwal 23955-6900, Saudi Arabia

*Corresponding author

# Note S1. Synthesis of PMSQ aerogel through surfactant-mediated sol-gel process

The fabrication of a spectrally selective air locking silica aerogel fundamentally relies on the creation of ultrafine pores and skeletal framework. Such morphology can be rendered either by inducing nucleation and growth1 or spinodal decomposition2 during the sol-gel transition.3 However, compared to the “pearl necklace-like” network typically derived from the nucleation and growth pathway,4 spinodal decomposition produces highly interconnected non-particulate structures, i.e., skeletal framework, with high porosity and improved mechanical stability.2, 5 This method also obviates the need for an extensive aging step, thereby reducing processing time and simplifying production. However, the characteristic length scale and domain size that emerges during spinodal decomposition is not a static property but rather is related to the kinetics of the process. The growth of domains with time and the emergence of characteristic length scales can be modeled by the Cahn-Hilliard equation:6-8

Where , , , and represent the concentration of a system component, the mobility coefficient, the first derivative of free energy density with respective to , and the gradient energy parameter, respectively. The second term on the right-hand side of the equation accounts for the energetic penalty associated with creating and maintaining an interface between different phases. Hence, a larger leads to faster phase separation. After the initial stages of demixing, the components undergo Ostwald ripening, or domain coarsening, to minimize the interfacial area, thereby further lowering the total free energy of the system.9 In the case of poly(methylsilsesquioxane) (PMSQ) polymer and water as the solvent, the inherent immiscibility between the two species results in a large between the two species, which favors the formation of small interfacial areas. Consequently, the resulting PMSQ aerogel tends to form in a particulate structure with a large particle diameter. This phenomenon has been previously reported2, 10-12 and was also observed in our study. (Figure S1d)

The presence of surfactants in polymer-solvent mixtures can significantly alter the phase diagram and kinetics of phase separation by lowering and the interfacial tension between the polymer-rich and solvent-rich phases.13 Therefore, the rate of domain coarsening is significantly suppressed compared to systems without surfactants, potentially leading to finer domain structures. Suppression of domain growth can likewise be caused by surfactants accumulating at the interface between the emerging phases, impeding the diffusion of polymer chains and solvent molecules that is necessary for the growth and coarsening of the separated domains.14 The effect of coarsening suppression is dependent on both the intrinsic properties of the surfactant and its concentration. For instance, small molecules are able to pack more densely at the interface, resulting in larger local density and more pronounced reduction of interfacial tension.15 In addition, the molecular structure of the surfactant, such as the ratio of hydrophilic to hydrophobic chains for nonionic block copolymers, plays a key role in determining the Flory-Huggins interaction parameter, and in turn governs the values of , with the solvent and polymer.8, 16 Effective surfactants exhibit balanced interactions, enabling them to concentrate at the interface and screen unfavorable polymer-water contacts, thereby lowering interfacial tension. In terms of the effect of surfactant concentration, at low concentration levels, the domain size,, might still follow a power-law growth () but the growth exponent tends to decrease as surfactant concentration increases.14, 17 At higher concentrations, the growth becomes significantly slower, potentially following a logarithmic form (), eventually approaching saturation where growth is effectively halted.13, 14, 17 Therefore, higher initial surfactant concentrations often lead to smaller average domain sizes in the final or near-equilibrium state. These observations underscore the critical role of surfactants in controlling the structure and properties of the resulting aerogels, with implications for optimizing their performance in various applications.

Building on the theoretical foundation and inspired by the works of Ueoka *et al*.,2 we synthesized PMSQ aerogel as the spectrally selective air lock by inducing surfactant-mediated spinodal decomposition during the sol-gel process. To obtain optimal spectral and thermal properties, we controlled the concentration of surfactant while fixing those of the organosilicon monomer (methyltrimethoxysilane, MTMS) and water. The surfactant of choice in this work was the nonionic triblock copolymer Pluronic P84 (EO19PO43EO19). Having a relatively low chain length and medium hydrophilic-lipophilic balance (HLB ~ 14)18, it effectively suppressed the kinetics of spinodal decomposition at sufficiently high concentration, leading to homogeneous mesopores and refined skeletal network. As shown in Figure S1, in the absence of P84, macroscopic phase separation took place, forming relatively large (70 – 200 nm), dense, non-porous PMSQ nanoparticles, as evidenced by SEM image and the lack of a significant mesopore peak in the BJH analysis. Macroscopically, the product was particulate, fragile, and had poor solar-weighted transmittance (43%) due to intense scattering. As P84 was introduced, the inception of a bicontinuous mesoporous network was observed, and a mesopore population the appeared centered around 36 nm. At this concentration, P84 started to modify interfacial tension and suppressed domain coarsening, but not yet achieving the ideal microstructure as reflected by the medium solar-weighted transmittance (81%). An optimal morphology was achieved at an intermediate surfactant ratio (P84:MTMS = 0.8). The peak solar-weighted transmittance (96%) mirrored the fine, homogeneous skeletal framework with a shifted and narrow mesopore distribution (13 nm), which minimized light scattering losses. However, further increasing the P84 concentration to P84:MTMS = 1.0 led to a degradation of the structural homogeneity and optical performance. The SEM image reveals a coarsening of the solvent domain, and the pore size distribution analysis shows a shift back towards larger mesopores (18 nm peak) with a broader distribution compared to the optimal case. As discussed previously, while increasing surfactant concentration generally slows domain growth and reduces final domain size, excessively high concentrations can potentially lead to different surfactant aggregation behavior (e.g., formation of larger or different types of micelles/aggregates). This disruption results in less controlled phase separation, allowing for coarsening of the solvent domains or the PMSQ skeleton before structural arrest, leading to larger, less uniform pores and diminished optical transparency due to increased scattering. Thus, Figure S1 demonstrates a non-monotonic dependence of PMSQ aerogel structure on the P84 surfactant concentration, highlighting the existence of an optimal concentration window where the surfactant most effectively directs the phase separation process to yield a desirable, fine, and homogeneous mesoporous network.

# Note S2. Heat transfer analysis of the absorber

To elucidate the impact of aerogel coverage on the heat transfer in an MISD system, we conducted a temperature analysis for the bare absorber and absorber with aerogel insulation. The illustration of the upward heat loss pathways is shown in Figure 4a - b. For a bare absorber, the incoming thermal energy is represented by Equation :

where and are the heat input to the absorber and solar irradiation intensity, respectively, and is the solar absorptance of the absorber. The input thermal energy is then transported in three pathways – downward for water evaporation, and losses to the environment in the upward and lateral directions. When insulated by thick (> 20 mm) insulating foams (thermal conductivity = 0.03 W·m−1·K−1) on the peripheries, lateral loss is negligible. Therefore, in this analysis, we consider heat loss in the upward direction () only, which consists of two terms – convective and radiative ­loss. Under indoor, laboratory conditions, is calculated according to Equation :

Where is the average convection coefficient over the solar absorber. and are the temperature of the solar absorber and the ambient environment (25°C), respectively. the emissivity of the solar absorber, which is assumed to be independent of temperature, direction, and wavelength. The average convection coefficient is further categorized into windless and windy cases. Under windless conditions, natural convection takes place on the heated absorber. can be obtained from the following correlations:19

for

where is the Nusselt number. is the characteristic length of the absorber (which, in our case, is exactly the side length of the absorber as it is square-shaped). is the thermal conductivity of air, which is assumed to be constant and independent of temperature. is the Rayleigh number of an upward-facing heated horizontal plate, which is given by Equation :

where is gravitational acceleration. is the coefficient of volume expansion. and are the kinematic viscosity and the Prandtl number of air, respectively.

Under windy conditions, assuming the flow is laminar across the entire absorber, the local Nusselt number, , is given by Equation :20

where is the Reynolds number at a distance from the leading edge of the absorber. is expressed as , where ,, and represent the density, velocity, and dynamic viscosity of air. The laminar assumption is validated by checking the Reynolds number at the maximal length of the absorber, . With Equation , (local heat convection coefficient) can be obtained. The average over the entire absorber is determined according to Equation :

Under outdoor, field conditions, the radiative heat loss component is modified to account for the variation of atmospheric transmittance with wavelength according to Equation :

where is the angular integral over a hemisphere. is the direction- and wavelength-dependent emissivity of the atmosphere, which is obtained by , where is the atmospheric spectral transmittance produced using the program IRTRANS4.21 is the blackbody spectral radiance at radiative surface temperature or , where , , , and represent the Planck constant, speed of light, wavelength, and Boltzmann constant, respectively. It should be noted that atmospheric thermal radiation predominantly originates from the near-ground atmosphere. Hence, ambient temperature () is employed in estimating atmospheric radiation, which is consistent with established practices.22-24 Additionally, this work used spectral atmospheric emissivity instead of lumped effective atmospheric emissivity, eliminating the need for effective sky temperature approximations that assume constant sky emissivity.23-25 Moreover, in our calculation, the integration was performed from 2.5 to 35 μm since at relevant absorber temperatures, spectral radiance is negligible beyond 35 μm.

In a sunlit, windless environment, natural convection takes place on the heated absorber with a relatively low value of (100 ~ 101 W·m−2·K−1). Under 1 kW·m−2 irradiation, of the absorber at typical operating temperatures (44 – 60°C) constitutes 40 – 60% of the total incoming energy flux. The remaining heat can facilitate efficient water evaporation. In contrast, when wind is present, forced convection occurs instead. With significantly elevated values of  (101 ~ 102 W·m−2·K−1) and , the amount of heat available for water evaporation is markedly reduced, leading to a substantial decline in clean water production rate.26

In the case where the solar absorber is covered by an aerogel, is modified to according to Equation due to the aerogel’s non-unity transmittance:

where is the solar-averaged transmittance of the aerogel in the range of 0.3 – 2.5 μm. At a given density and nanostructural features, is primarily a function of aerogel thickness, .27 An increase in results in a reduction of due to higher chance of internal scattering and absorption. Meanwhile, is modified to according to Equation :

where, , and are the aerogel’s thermal conductivity, top surface temperature, and spectral transmittance, respectively. Equation essentially states that is comprised of conductive loss from the absorber across the aerogel, as well as radiative loss from the absorber through the aerogel into the air. The radiative loss is calculated by integrating the spectral radiance across the spectrum, taking into consideration the aerogel transmittance at different wavelengths.

To obtain the conductive loss term in Equation , has to be known. The relation between and is obtained by Equation :

where is the aerogel’s surface emissivity. The two terms on the right-hand side represent the convective and radiative loss from the aerogel’s surface to the ambient environment. For simplicity, the emissivity of ambient environment is assumed to be 1.

Equation through suggest that, to minimize , should approach , a condition that can be attained through increasing the thickness of aerogel. However, this will concurrently reduce , in leading to a decrease in utilizable thermal energy. Therefore, an optimal thickness of the aerogel can be identified, which achieves a balance between high transmittance and the proximity of to . In short, this analysis emphasizes the trade-off in the application of aerogel between minimizing heat loss and optimizing solar energy absorption in MSD design. Identifying optimal aerogel thickness is critical to balance these factors and enhance overall device performance.

# Note S3. Heat and Mass Transport Model of MSD

The theoretical simulation model considered the coupling of mass and energy transport within each stage of a 6-stage MSD, in the presence of aerogel of different thickness (0 – 12 mm) and under varying wind speed (0 – 6 m·s-1). The model was developed in a LabView simulation environment (version 2020), with the following assumptions:26, 28-30

1. The device operates at a steady state.
2. The thermophysical and spectral properties of all solid components are constant, temperature-independent.
3. The temperature gradient across the thin (1 mm) stainless-steel plate as well as in-plane temperature gradient is negligible due to its high thermal conductivity.
4. Water evaporation from the capillary wick inside the evaporator is uniform across the entire surface.
5. Convective heat and mass transfer within each stage is negligible since the thickness of each stage is small and the temperature gradient is opposite to the gravitational force (i.e., no natural convection).
6. Vapor transport is driven by the vapor pressure gradient present in each stage, which can be approximated by the characteristics of pure water given the relatively low salinity (35 g·L−1) commonly found in seawater.
7. The influence of liquid water formed on the condenser on the condensation process is neglected.
8. Heat and mass transport within the device is predominantly one-dimensional, since losses at the side walls are negligible and the device dimensions perpendicular to vapor flow are considerably greater than the inter-stage gap.
9. There is no vapor or liquid loss as the device is well sealed.

Incoming heat from sunlight, after some losses from the absorber to the ambient, is input to the device. Heat transfers across the air gap within the device via convection, conduction, and radiation. The conductive heat transfer, , is calculated according to Fourier’s law in Equation :

where is the thermal conductivity of air (assumed to be constant at 26 mW·m−1·K−1), and are the temperature of the evaporator and the condenser, respectively, and is the thickness of air gap. Heat conduction parallel to the evaporator and condenser surface is assumed to be negligible as the temperature gradient across the air gap is considerably larger than that across the surfaces parallel to the evaporator and condenser.

The radiative heat transfer between the evaporator and condenser,, is expressed as Equation :

where represents the emissivity of the stainless-steel plate.

The convective heat transfer, , facilitated by the processes of water evaporation on the evaporator, vapor diffusion across the air gap, and vapor condensation on the condenser, is calculated using Equation :

where is the vapor flux. In this work, all the generated vapor is assumed to be condensed and collected. Hence, is equivalent to distillate flux. is the latent heat of the vapor. Here, heat and mass transfer are coupled. Since the vapor flux is sufficiently low (W·m−2)31, vapor transport is considered diffusion-dominated and can be described by Fick’s law according to Equation :

where is the diffusion coefficient of vapor in air. and are the vapor pressure at the evaporator and condenser, respectively, which are temperature-dependent and can be determined using Antoine equation in Equation 32:

where , , and are water-specific constants, and can be or , the temperature at the evaporator or condenser, respectively.

Heat loss through the sidewalls, , primarily via conduction, is estimated using Equation :

where is the total thermal resistance of the sidewalls per unit area of the sidewall and the ambient air according to Equation :

where and is the thickness and thermal conductivity of the insulating foam covering the sidewalls.

The relationship between heat transfer in each stage and the rate of distillate production can be established using Equation S1 – S18, for the uninsulated device, Equation , and the aerogel-insulated device, Equation :

where represents the total stage number. The model is then solved iteratively for each stage. The total distillate flux is .

# Note S4. 2-D Heat Transfer Modeling Using Finite Element Method (FEM) in Ansys Fluent

To investigate the heat transfer in the absorber and aerogel under windless and windy conditions, a 2-D numerical model was developed using the Finite Element Method (FEM) implemented in Ansys Fluent (version 2024 R2). The simulation considered steady-state heat transfer, incorporating conduction, convection, and radiation. The computational domain was defined as a 2-D rectangle, representing the cross-section of the absorber, aerogel, and air. Mesh was generated using Ansys Fluent's meshing tools with an element size of 0.25 mm, which ensures sufficient resolution to capture the temperature gradients and no meshing dependence. The absorber was modeled as a constant energy source with the thermal properties of stainless steel, while the aerogel was modeled as a semitransparent material with a constant thermal conductivity, 22 mW·m−1·K−1 and an absorption coefficient of 6.9 m−1 in the wavelength of 3.5 – 4.75 μm and 150 m−1 above 4.75 μm. The absorption coefficient of aerogel in the thermal region was derived from the optical measurements (Figure 2d) while the scattering coefficient was considered zero due to the refined skeletal framework (Figure 2b). Heat transport in the absorber and aerogel were modeled using the governing equations for heat conduction, convection, and radiation. Radiative heat transfer was modeled using the discrete ordinates method to account for the transmittance and absorption of radiation by the aerogel and air.

The energy source was set to a specified value based on the experimental conditions, including the solar flux, solar absorbance of the absorber, and transmittance of the aerogel. For radiative heat transfer, the top boundary of the absorber was treated as a heat source, emitting thermal radiation according to its temperature and emissivity. The bottom of the absorber is treated as a wall experiencing heat dissipation at a constant flux based on the single-stage distillate flux from the experimental data. The side boundaries of the absorber and aerogel were modeled as insulating walls, while those of the air domain were modeled as velocity inlet and pressure outlet. For the modeling of indoor conditions, the upper boundary of the air domain was maintained at 25°C, while for outdoor conditions, it was set to −270°C. The FEM solution was performed using the built-in solvers in Ansys Fluent, and the convergence criterion was set to a residual of 10−4 for the continuity, x- and y-velocity, and 10−6 for energy equation and DO intensity. The results obtained from the simulation were validated by comparing the computed temperature profiles with experimental measurements. The simulation results demonstrated good agreement with experimental data, confirming the validity of the numerical approach.

**Table S1.** Previous studies on MISD comparing the water production rate obtained in laboratory settings with that obtained outdoors. The water production rates have been converted to kg·kWh−1 to account for the variation of solar irradiation. DF: distillate flux.

| **Reference** | **Source water** | **Stage number** | **Indoor DF, kg·kWh**−**1** | **Outdoor DF, kg·kWh**−**1** | **Out/In** |
| --- | --- | --- | --- | --- | --- |
| *33* | Seawater (Ligurian Sea) | 10 | 3.28 | 2.07 | 0.63 |
| *34* | 3.5% NaCl | 10 | 5.78 | 2.6 | 0.45 |
| *35* | Seawater | 3 | 2.00 | 1.25 | 0.63 |
| 36 | Seawater | 6 | 2.20 | 1.45 | 0.66 |
| *37* | Seawater  (Red Sea) | 8 | 3.85 | 1.66 | 0.43 |
| *38* | Seawater | 4 | 2.38 | 2.19 | 0.92 |
| *39* | Seawater | 6 | 2.54 | 1.09-1.25 | 0.43-0.49 |
| *40* | Seawater | 5 | 3.00 | 1.44 | 0.48 |
| *41* | Seawater (Huanghai) | 8 | 2.25 | 2.0 | 0.89 |
| *42* | 20% NaCl | 10 | 0.70 | 0.5 - 0.7 | 0.71 - 1 |


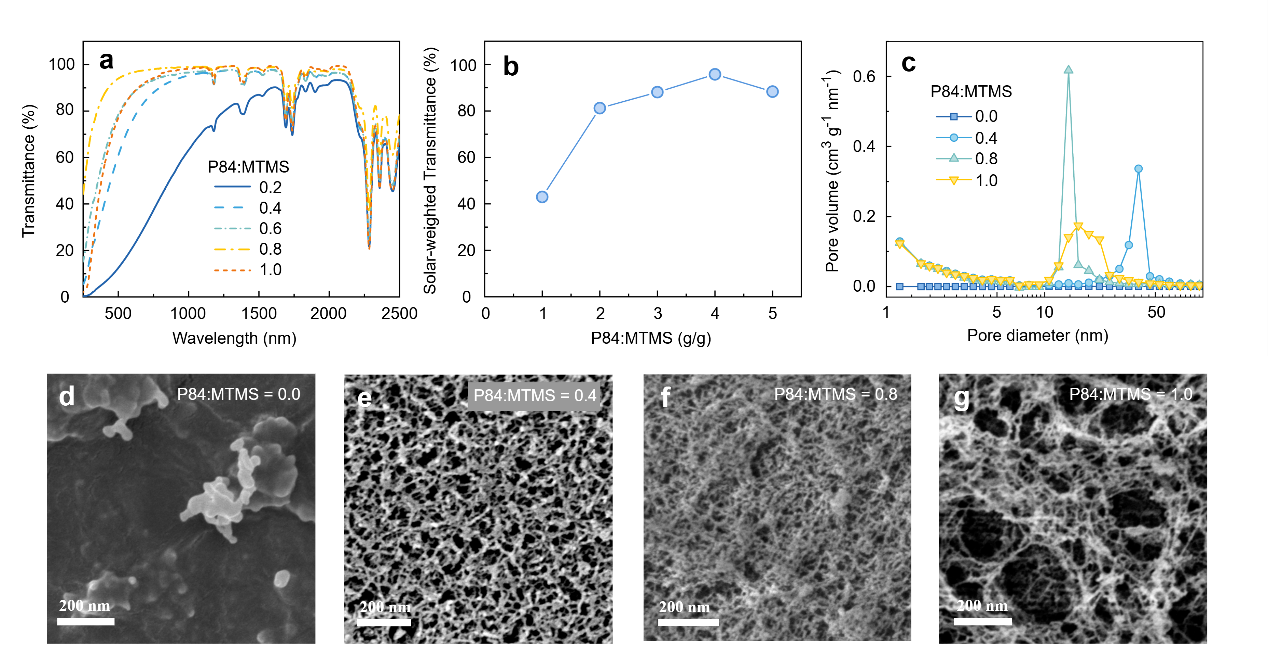


**Figure S1.** Optical and structural characterization of poly(methylsilsesquioxane) (PMSQ) aerogels prepared via the P84-assisted sol-gel synthesis. (a) Direct hemispherical transmittance spectrum of the aerogels as a function of P84-to-MTMS mass ratio. (b) Corresponding solar-weighted transmittance showing a maximum at P84:MTMS = 0.8. (c) BJH pore size distribution for representative samples, revealing a transition from non-porous nanoparticle (0.0) to a narrowly distributed mesopore population centered at 36 and 13 nm (0.4 and 0.8, respectively), before larger mesopores (18 nm) re-emerge at the highest surfactant level (1.0). Both surfactant deficiency and excess lead to broader pore distributions and diminished optical performance. (d – g) SEM images (scale bars: 200 nm) of the aerogel structure: (d) dense nanoparticles of 70 – 200 nm at 0.0; (e) inception of a bicontinuous mesoporous network at 0.4; (f) a homogeneous, fine skeletal framework at 0.8; and (g) growth of the solvent domain and coarsening of the skeletal framework at 1.0. MTMS: Methyltrimethoxysilane.


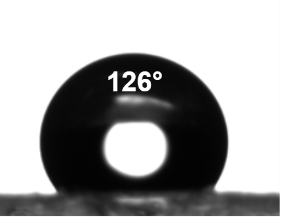


**Figure S2.** Water contact angle of the as-synthesized PMSQ aerogel (P84:MTMS = 0.8).


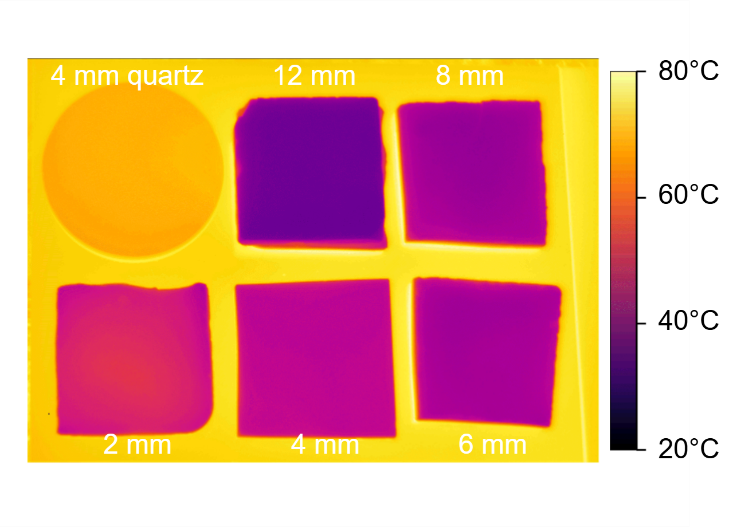


**Figure S3.**. The exceptional thermal insulation capability is manifested by the infrared photos of the aerogels on a heating plate at 60°C. As the aerogel’s optical thickness increased, the temperature difference between the aerogel top surface and the heating plate widened, suggesting suppressed radiative heat loss. A 4-mm thick quartz glass was placed on the top left corner for reference, which, due to its high thermal conductivity and low optical thickness, ineffectively suppressed thermal radiation, thereby exhibiting nearly identical temperature as the heating plate.


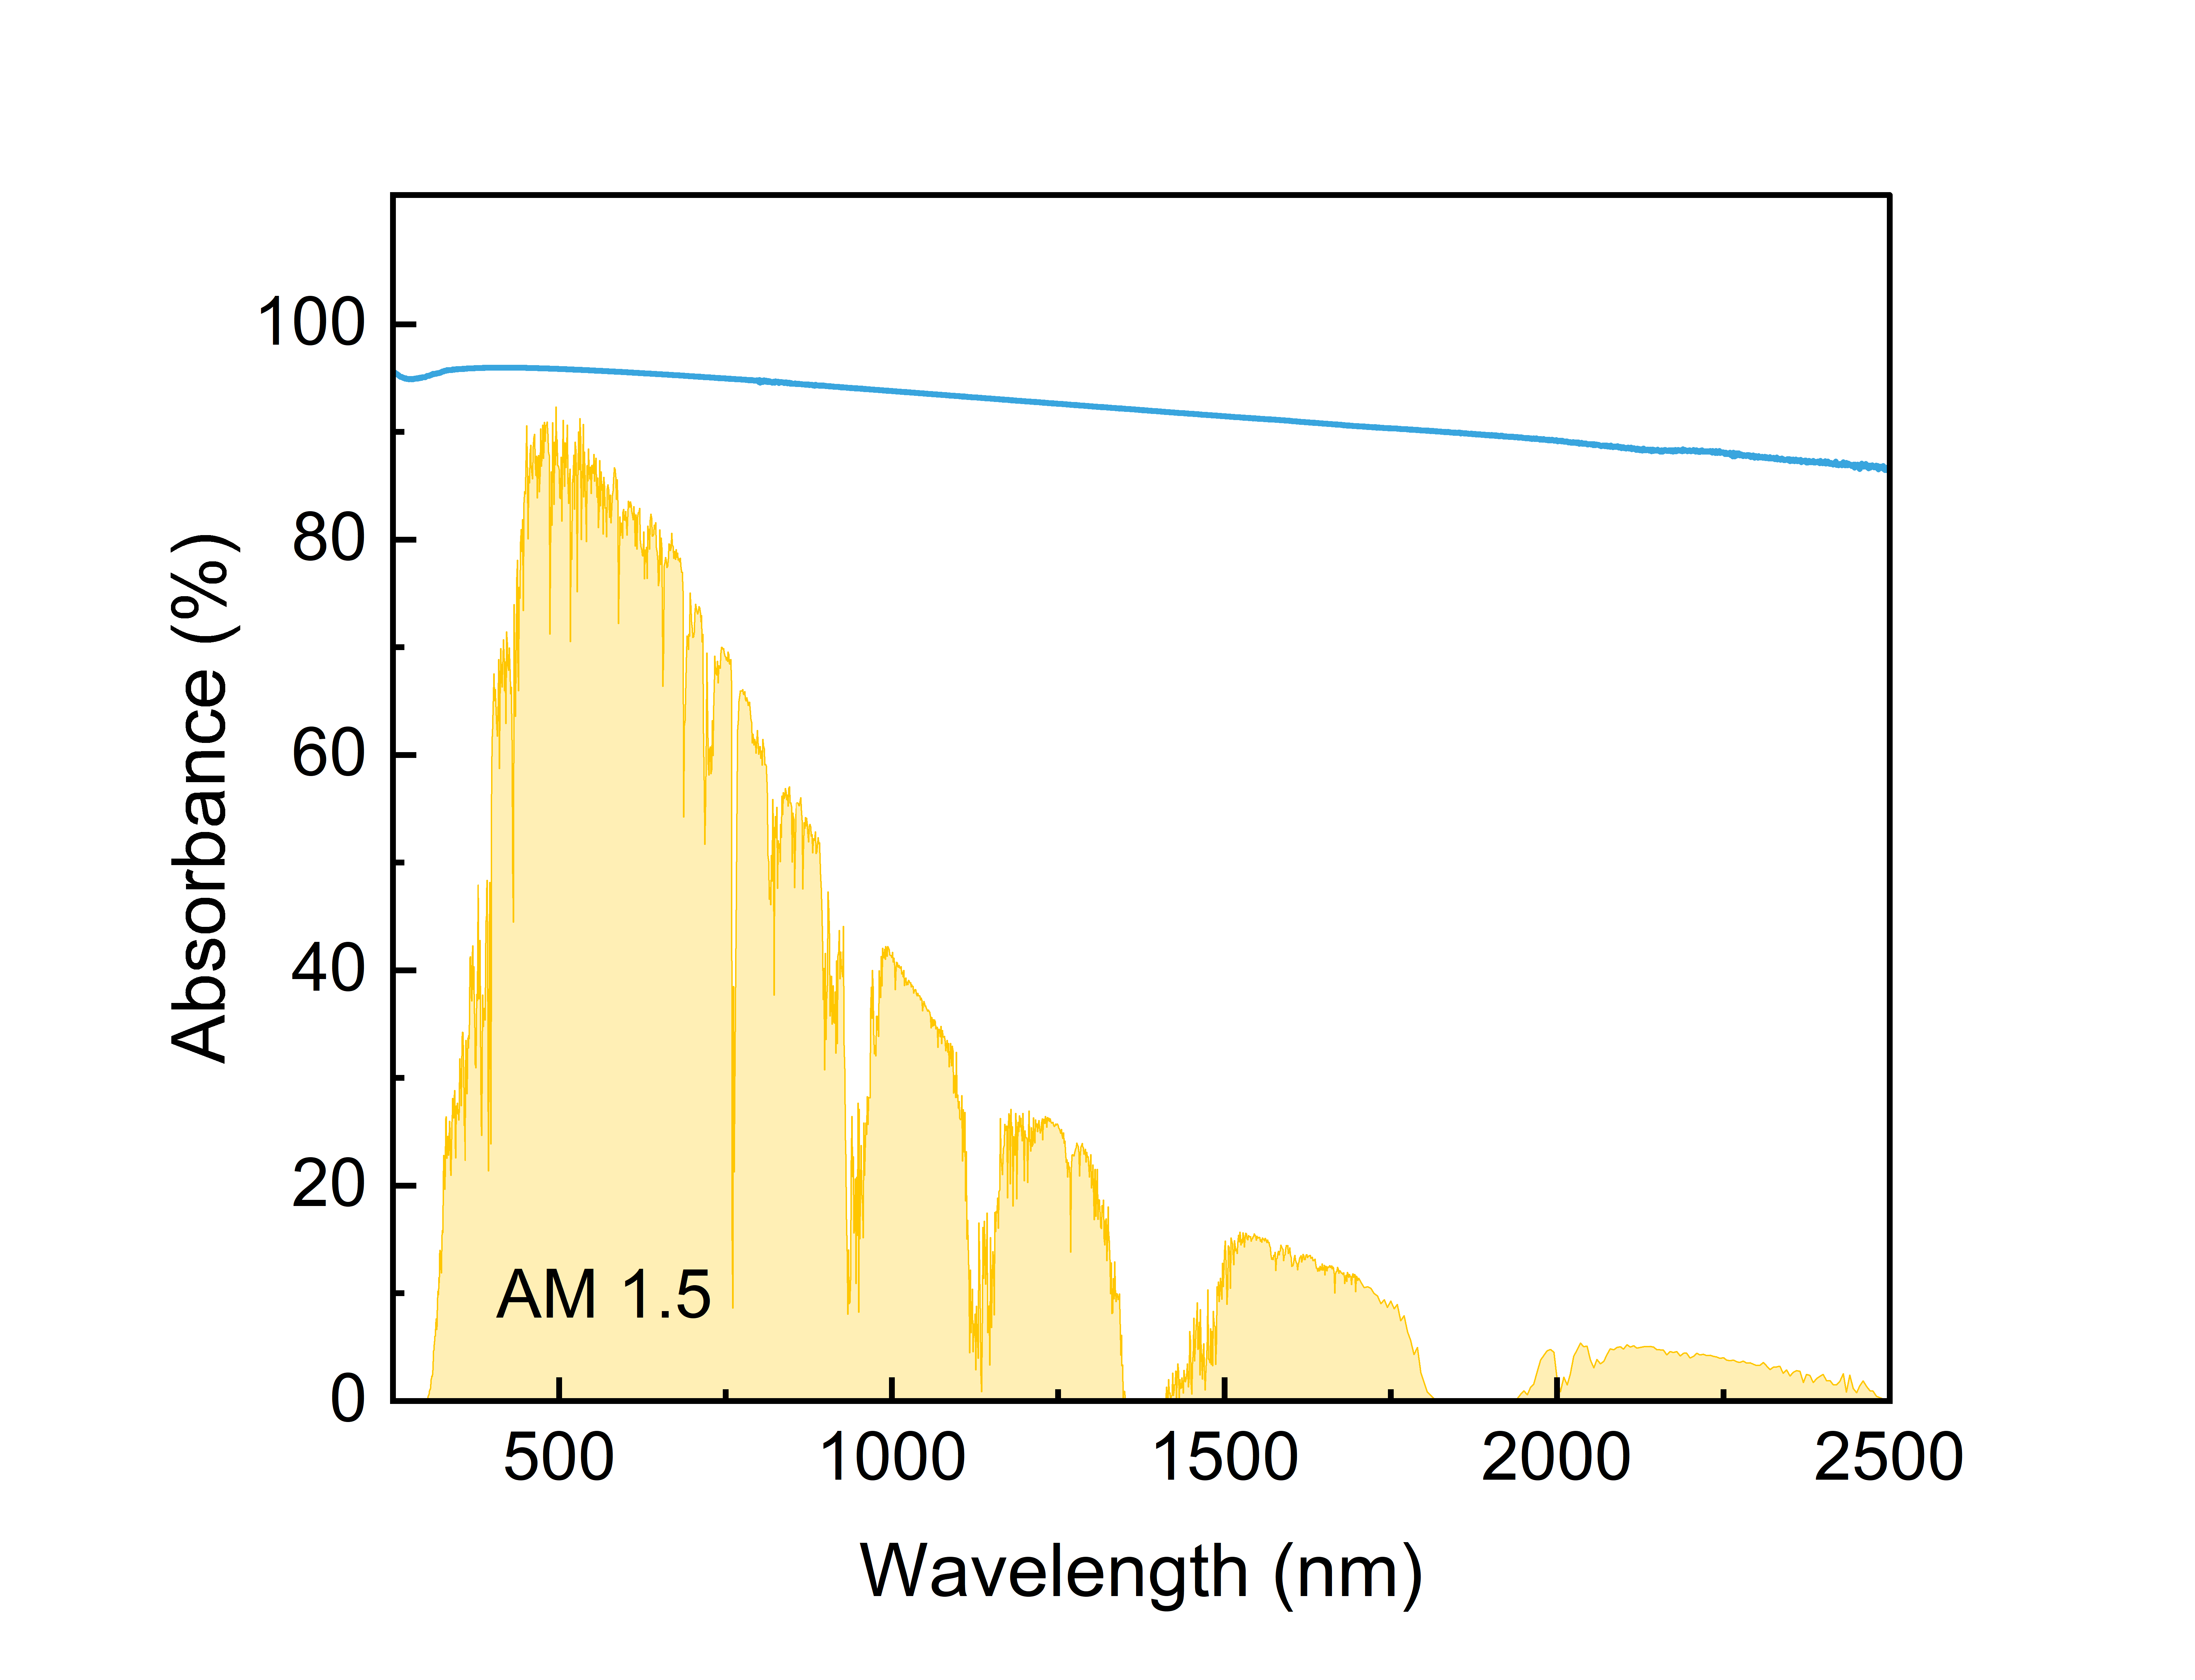


**Figure S4.** Absorbance spectra of the multi-walled carbon nanotube (MWCNT) absorber (blue line). The overall solar absorbance of the MWCNT absorber is 95%. The solar transmittance spectrum of air mass 1.5 (AM 1.5) is shown for reference (yellow shaded area).


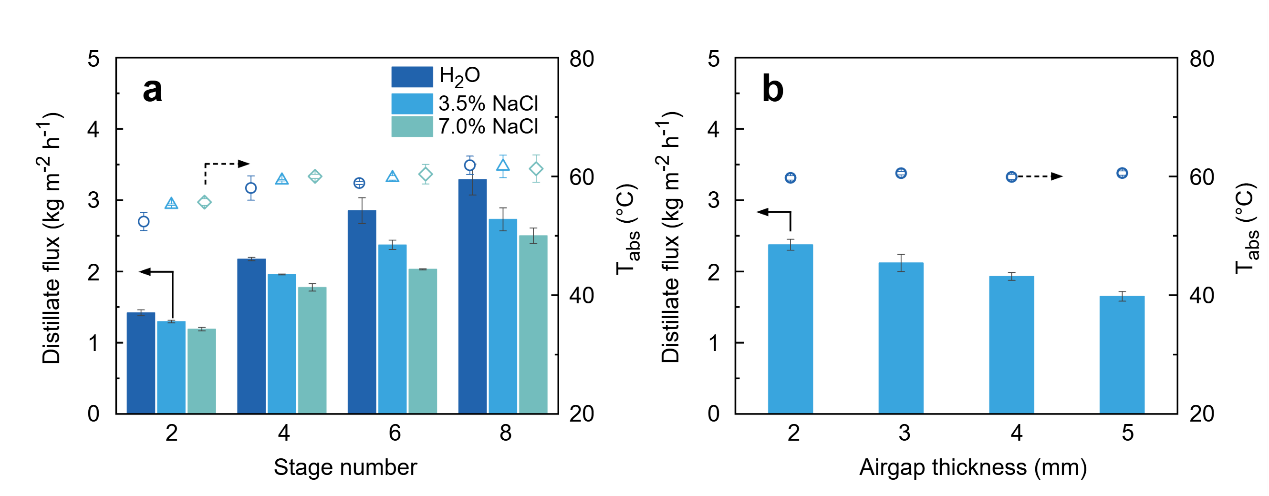


**Figure S5.** MISD device characterization (a) Distillate flux (bars, left y-axis) and absorber temperature (*T*abs, scatter, right y-axis) as a function of stage number and salinity of source water. Increasing stage number enhances distillate flux for all salinity, whereas increasing salinity leads to lowered distillate flux due to reduced vapor pressure. (b) Distillate flux and absorber temperature as a function of air gap thickness. Increasing airgap thickness reduces the distillate flux monotonically, while the absorber temperature remained relatively stable under all conditions. The tests were performed under a solar irradiance of 1 kW·m−2.


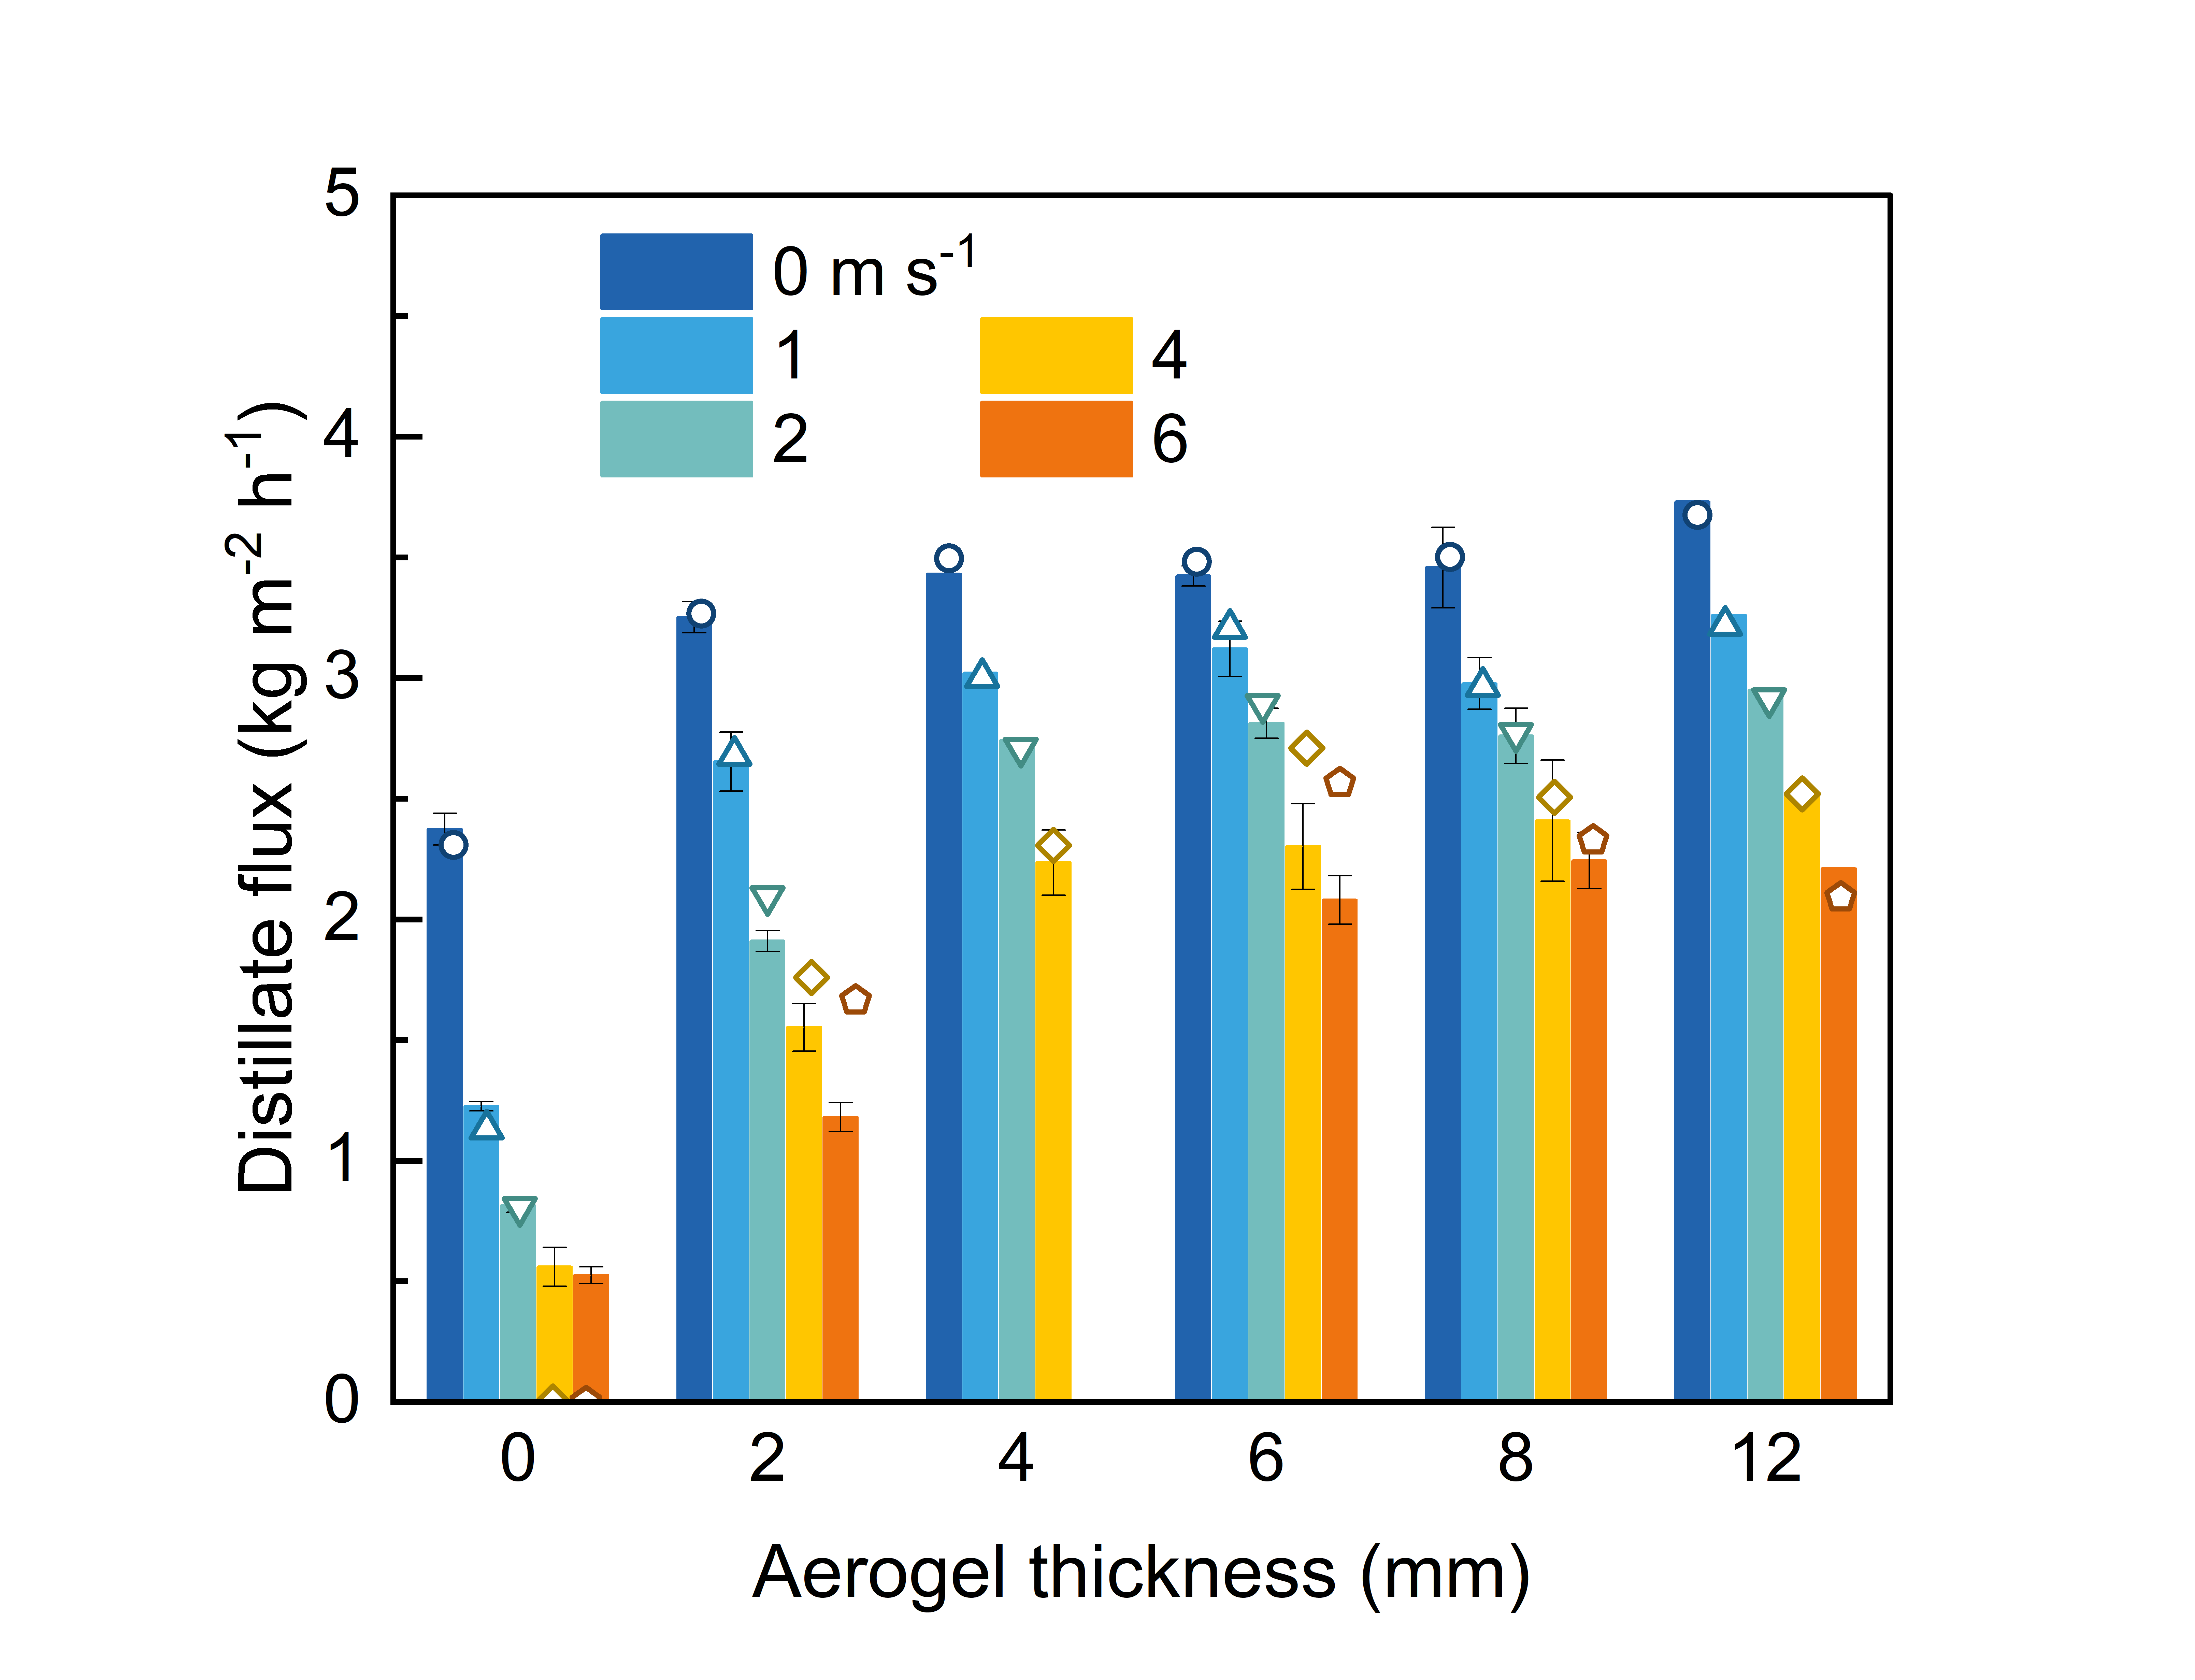


**Figure S6.** Distillate flux under varying wind speed and aerogel thickness for the 6-stage device, which had 80% of its absorber surface covered with aerogel. Simulation results are denoted by open symbols.


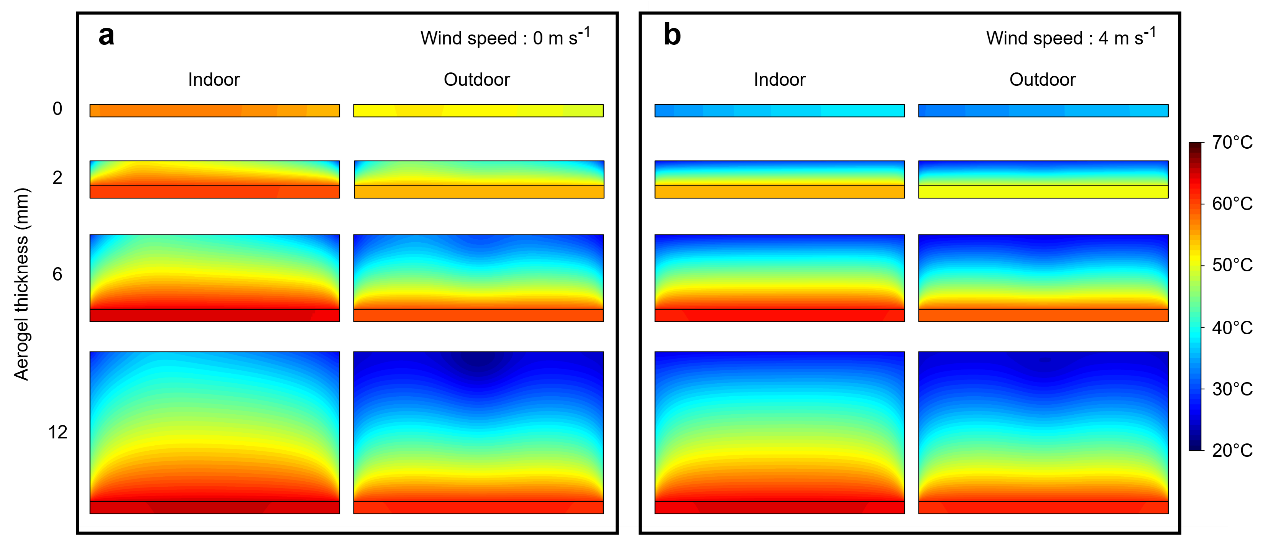


**Figure S7.** Finite element model simulation using Ansys Fluent, showing the temperature contour of the absorber and aerogel at different thickness (0, 2, 6, 12 mm) in indoor and outdoor settings under a wind speed of (a) 0 m·s−1 and (b) 4 m·s−1.


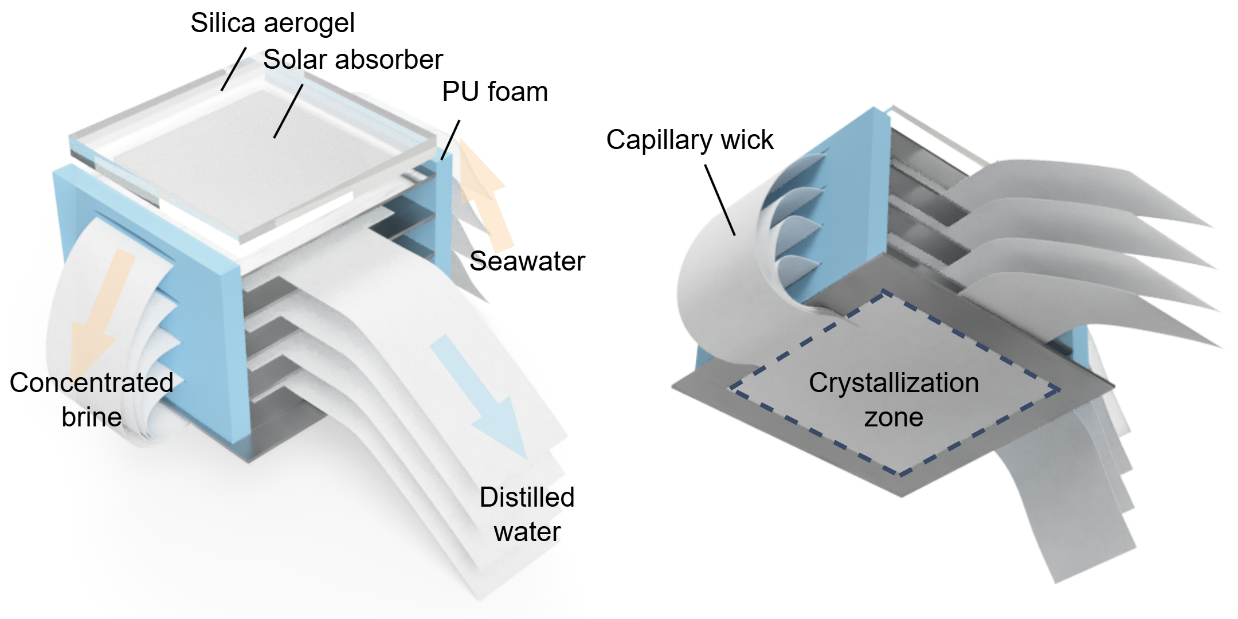


**Figure S8.** Schematic of the zero liquid discharge (ZLD) device used in outdoor experiment, showing the key components: a 6-mm thick SSAL aerogel covered for top thermal insulation, a solar absorber for solar-to-heat conversion, polyurethane (PU) foam for side-wall insulation, and a capillary wick for water transport within the evaporators and condensers, which are separated by an air gap of 2 mm. The concentrated brine is transported by the capillary wick to the bottom of the device, where heat from the bottom condenser is absorbed by the brine to drive water evaporation and salt crystallization. This design simultaneously achieves a large vertical temperature gradient and no waste brine generation, ensuring high distillate production rate and minimal environmental impact.26


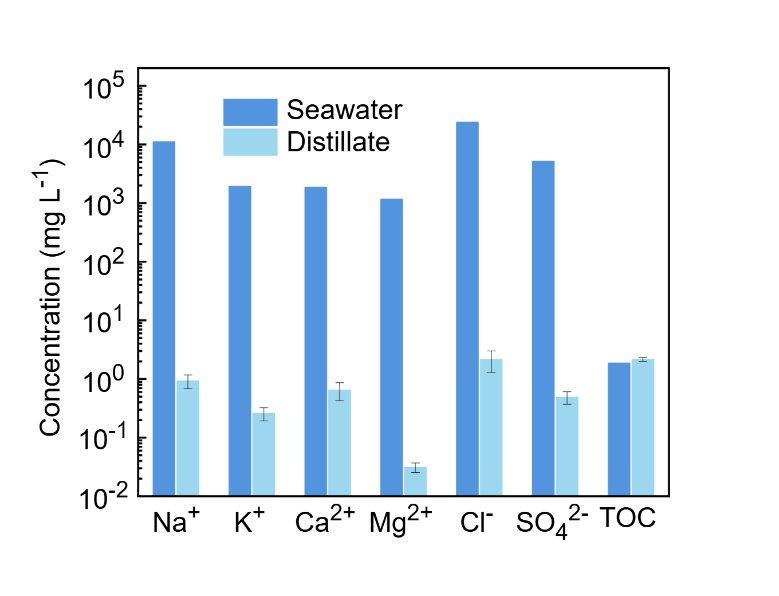


**Figure S9.** Concentration of selected ions and total organic carbon (TOC) of the original seawater and the collected distillate, showing effective removal of salts and contaminants in the distillate.


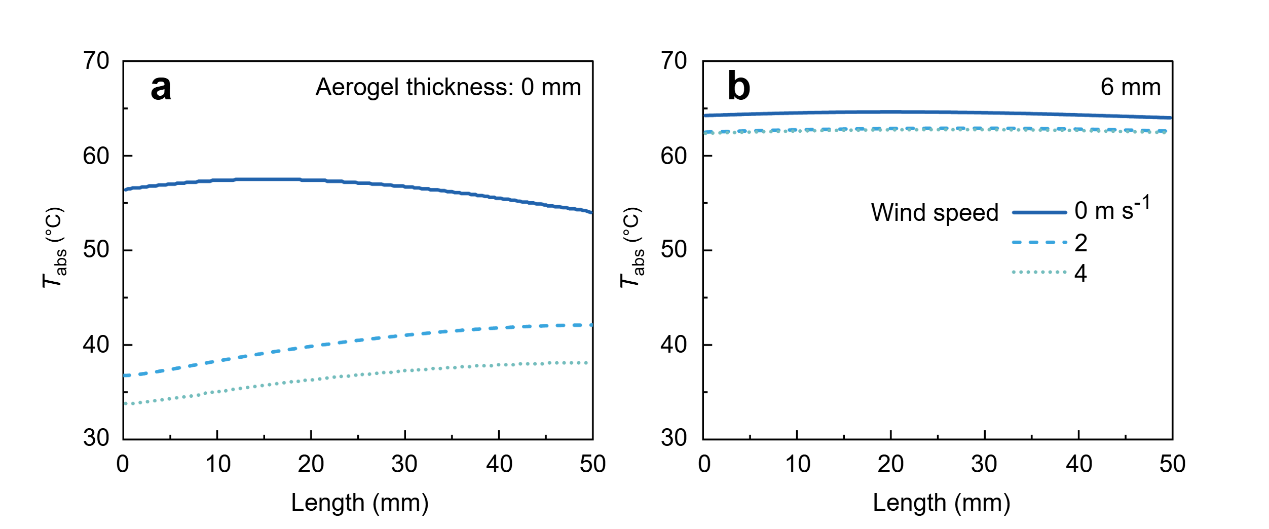
**Figure S10.** Temperature variation across the absorber surface (a) without aerogel and (b) with the insulation of a 6-mm aerogel under wind speeds of 0 m·s−1 (solid line), 2·m s−1 (dash line), and 4 m·s−1 (dotted line). The values were obtained from the FEM-based heat transfer modeling in Ansys Fluent.


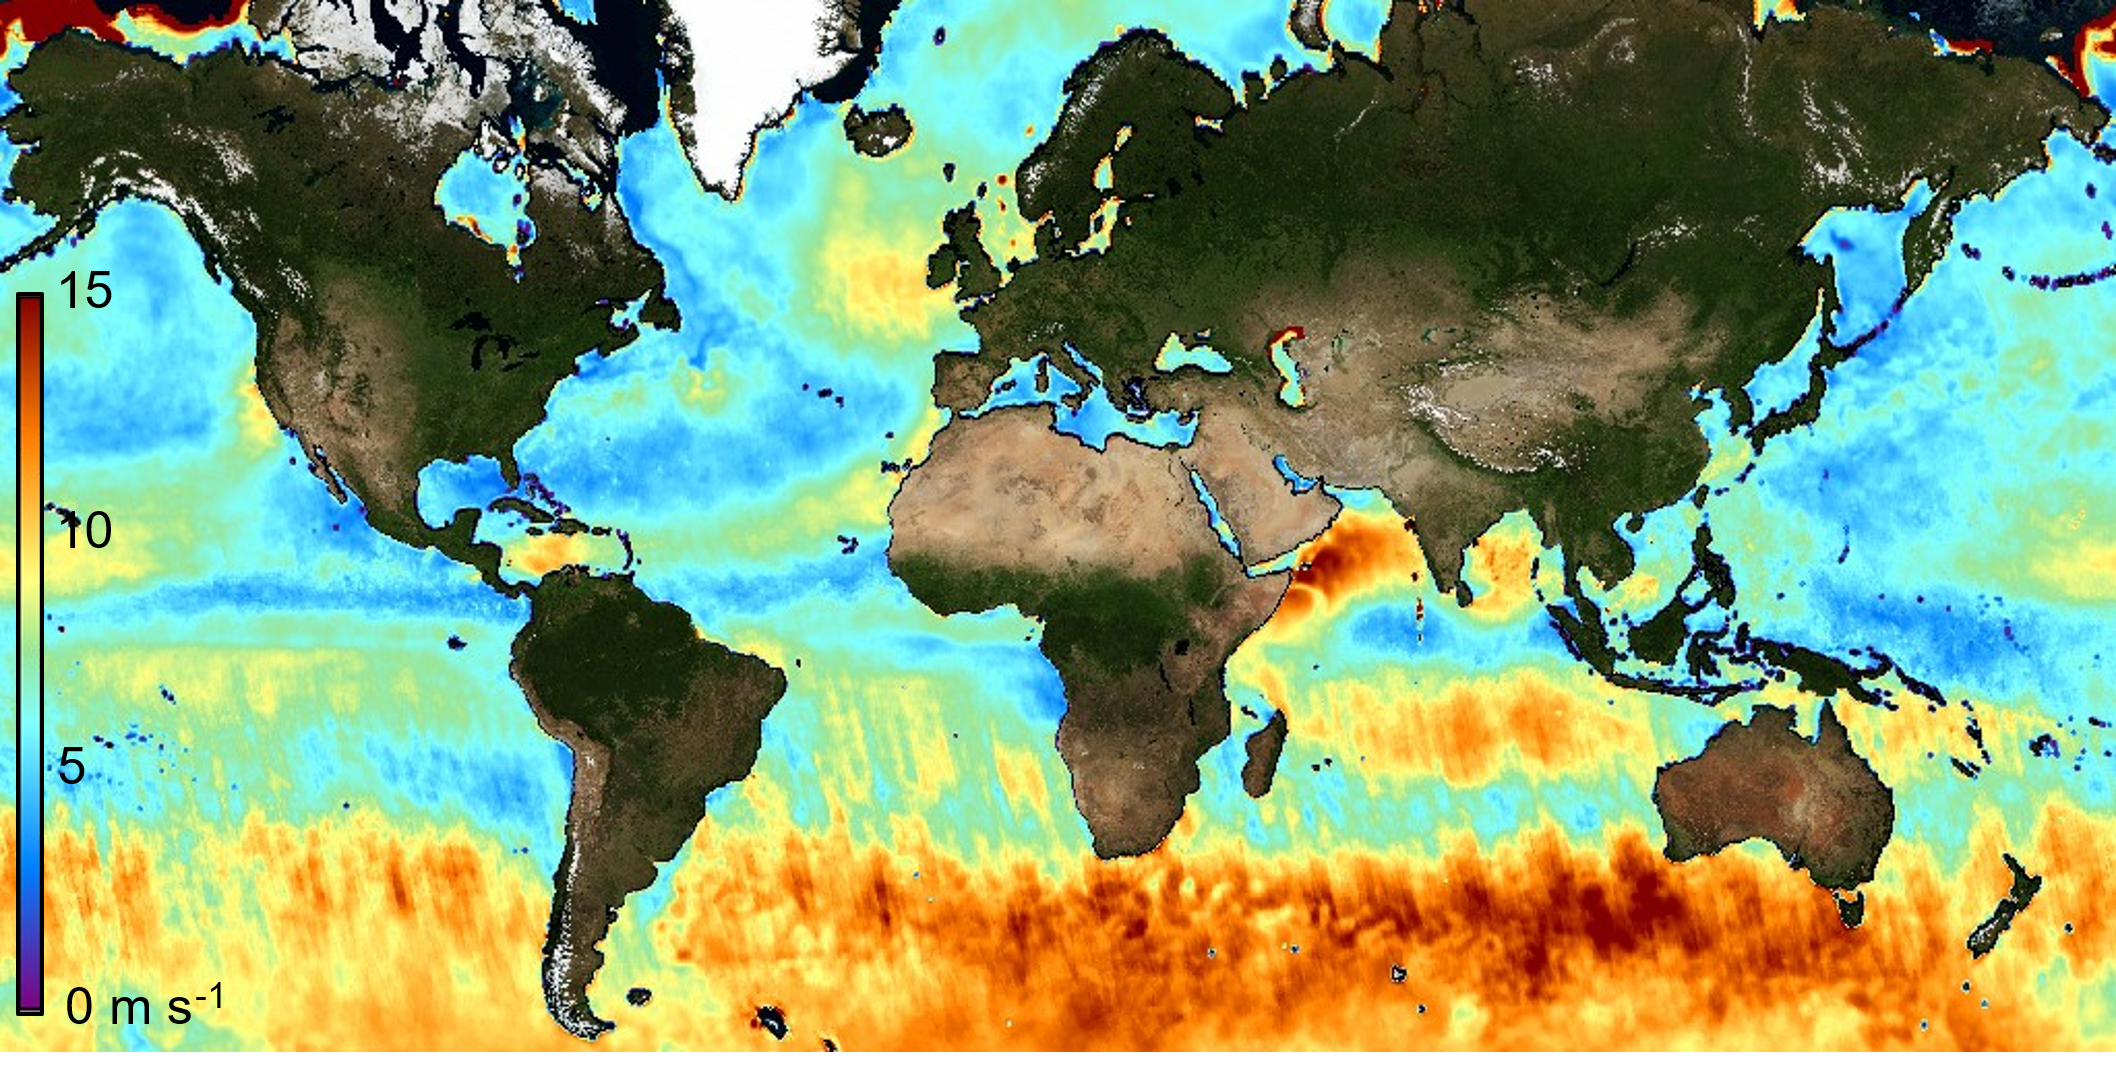
 **Figure S11**. Global map of wind speed at ocean surface. The average wind speed at coastal regions is frequently above 5 m·s−1. Retrieved on 13th November 2024 from AMSR, Japan Aerospace Exploration Agency (JAXA).


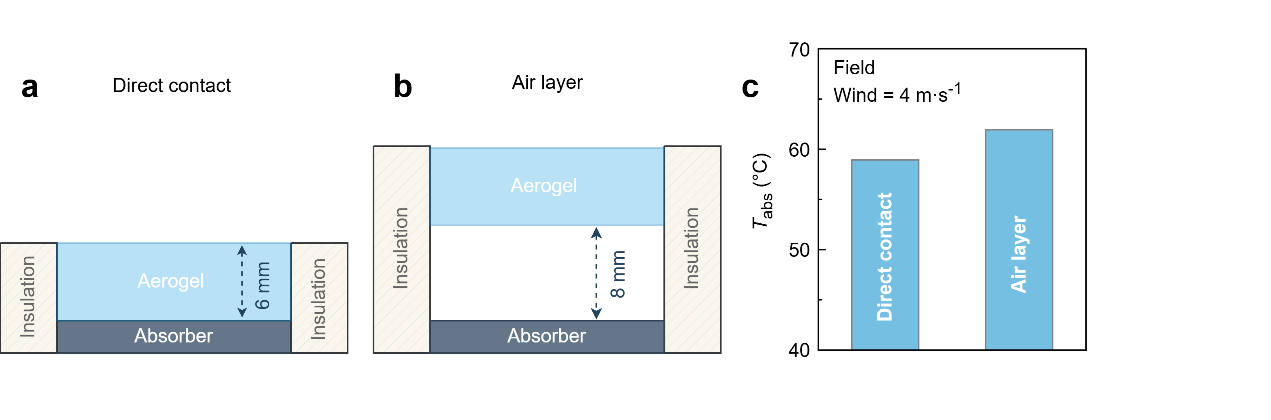


**Figure S 12**.Enhanced thermal management through air layer incorporation. (a) Direct contact configuration, with 6-mm SSAL aerogel directly interfacing with the absorber. (b) Modified configuration incorporating an 8-mm air layer between the absorber and aerogel to increase thermal resistance without additional optical losses and the occurrence of natural convection. (c) Comparison of absorber temperatures under field conditions at a wind speed of 4 m·s−1, demonstrating that air layer incorporation elevates absorber temperature from 58.9°C to 61.9°C, thereby enhancing the thermal performance of the solar desalination module.

# References

(1) Zhao, L.; Bhatia, B.; Yang, S.; Strobach, E.; Weinstein, L. A.; Cooper, T. A.; Chen, G.; Wang, E. N. Harnessing Heat Beyond 200 °C from Unconcentrated Sunlight with Nonevacuated Transparent Aerogels. *ACS Nano* **2019**, *13* (7), 7508-7516. DOI: 10.1021/acsnano.9b02976.

(2) Ueoka, R.; Hara, Y.; Maeno, A.; Kaji, H.; Nakanishi, K.; Kanamori, K. Unusual flexibility of transparent poly(methylsilsesquioxane) aerogels by surfactant-induced mesoscopic fiber-like assembly. *Nat. Commun.* **2024**, *15* (1), 461. DOI: 10.1038/s41467-024-44713-5.

(3) Karamikamkar, S.; Naguib, H. E.; Park, C. B. Advances in precursor system for silica-based aerogel production toward improved mechanical properties, customized morphology, and multifunctionality: A review. *Adv. Colloid Interface Sci.* **2020**, *276*, 102101. DOI: 10.1016/j.cis.2020.102101.

(4) Maleki, H.; Durães, L.; García-González, C. A.; del Gaudio, P.; Portugal, A.; Mahmoudi, M. Synthesis and biomedical applications of aerogels: Possibilities and challenges. *Advances in Colloid and Interface Science* **2016**, *236*, 1-27. DOI: 10.1016/j.cis.2016.05.011.

(5) Kanamori, K.; Nakanishi, K.; Hanada, T. Spinodal decomposition in siloxane sol-gel systems in macroporous media. *Soft Matter* **2009**, *5* (16), 3106-3113. DOI: 10.1039/B903444G.

(6) Cahn, J. W.; Hilliard, J. E. Free Energy of a Nonuniform System. I. Interfacial Free Energy. *J. Chem. Phys.* **1958**, *28* (2), 258-267. DOI: 10.1063/1.1744102.

(7) Cahn, J. W. On spinodal decomposition. *Acta Metallurgica* **1961**, *9* (9), 795-801. DOI: 10.1016/0001-6160(61)90182-1.

(8) Inguva, P. K.; Walker, P. J.; Yew, H. W.; Zhu, K.; Haslam, A. J.; Matar, O. K. Continuum-scale modelling of polymer blends using the Cahn–Hilliard equation: transport and thermodynamics. *Soft Matter* **2021**, *17* (23), 5645-5665. DOI: 10.1039/D1SM00272D.

(9) Yao, J. H.; Elder, K. R.; Guo, H.; Grant, M. Theory and simulation of Ostwald ripening. *Physical Review B* **1993**, *47* (21), 14110-14125. DOI: 10.1103/PhysRevB.47.14110.

(10) Kanamori, K.; Kodera, Y.; Hayase, G.; Nakanishi, K.; Hanada, T. Transition from transparent aerogels to hierarchically porous monoliths in polymethylsilsesquioxane sol–gel system. *J. Colloid Interface Sci.* **2011**, *357* (2), 336-344. DOI: 10.1016/j.jcis.2011.02.027.

(11) Hayase, G.; Kanamori, K.; Nakanishi, K. Structure and properties of polymethylsilsesquioxane aerogels synthesized with surfactant n-hexadecyltrimethylammonium chloride. *Microporous Mesoporous Mater.* **2012**, *158*, 247-252. DOI: 10.1016/j.micromeso.2012.03.049.

(12) Kurahashi, M.; Kanamori, K.; Takeda, K.; Kaji, H.; Nakanishi, K. Role of block copolymer surfactant on the pore formation in methylsilsesquioxane aerogel systems. *RSC Advances* **2012**, *2* (18), 7166-7173. DOI: 10.1039/C2RA20799K.

(13) Laradji, M.; Hong, G.; Grant, M.; Zuckermann, M. J. The effect of surfactants on the dynamics of phase separation. *Journal of Physics: Condensed Matter* **1992**, *4* (32), 6715. DOI: 10.1088/0953-8984/4/32/006.

(14) Melenkevitz, J.; Javadpour, S. H. Phase separation dynamics in mixtures containing surfactants. *J. Chem. Phys.* **1997**, *107* (2), 623-629. DOI: 10.1063/1.474422.

(15) Jönsson, B.; Lindman, B.; Holmberg, K.; Kronberg, B. *Surfactants and Polymers in Aqueous Solution*. Wiley: 2002.

(16) Lin, L. C.; Chen, S. J.; Yu, H. Y. Connecting Structural Characteristics and Material Properties in Phase-Separating Polymer Solutions: Phase-Field Modeling and Physics-Informed Neural Networks. *Polymers (Basel)* **2023**, *15* (24). DOI: 10.3390/polym15244711.

(17) Laradji, M.; Mouritsen, O. G.; Toxvaerd, S.; Zuckermann, M. J. Molecular dynamics simulations of phase separation in the presence of surfactants. *Phys. Rev. E* **1994**, *50* (2), 1243-1252. DOI: 10.1103/PhysRevE.50.1243.

(18) Alexandridis, P.; Alan Hatton, T. Poly(ethylene oxide)–poly(propylene oxide)–poly(ethylene oxide) block copolymer surfactants in aqueous solutions and at interfaces: thermodynamics, structure, dynamics, and modeling. *Colloids Surf. A Physicochem. Eng. Asp.* **1995**, *96* (1), 1-46. DOI: 10.1016/0927-7757(94)03028-X.

(19) Çengel, Y. A.; Cimbala, J. M.; Turner, R. H. Chapter 20 - Natural convection. In *Fundamentals of thermal-fluid sciences*, 4th ed.; McGraw-Hill, 2012

(20) Çengel, Y. A.; Cimbala, J. M.; Turner, R. H. Forced convection. In *Fundamentals of thermal-fluid sciences*, 4th ed.; McGraw-Hill, 2012.

(21) UKIRT. *Atmospheric transmission*. (The atmospheric transmission versus wavelength for Mauna Kea was produced using the program IRTRANS4 with the following parameters — Altitude: 4200m. Airmass: 1.0. H2O column: 1.2mm. Resolving power: 3000) <https://about.ifa.hawaii.edu/ukirt/calibration-and-standards/astronomical-utilities/transmission-and-extinction/atmospheric-transmission/> (accessed 2025 March).

(22) Raman, A. P.; Anoma, M. A.; Zhu, L.; Rephaeli, E.; Fan, S. Passive radiative cooling below ambient air temperature under direct sunlight. *Nature* **2014**, *515* (7528), 540-544. DOI: 10.1038/nature13883.

(23) Zhao, D.; Aili, A.; Zhai, Y.; Lu, J.; Kidd, D.; Tan, G.; Yin, X.; Yang, R. Subambient Cooling of Water: Toward Real-World Applications of Daytime Radiative Cooling. *Joule* **2019**, *3* (1), 111-123. DOI: 10.1016/j.joule.2018.10.006.

(24) Zhao, D.; Aili, A.; Zhai, Y.; Xu, S.; Tan, G.; Yin, X.; Yang, R. Radiative sky cooling: Fundamental principles, materials, and applications. *Appl. Phys. Rev.* **2019**, *6* (2). DOI: 10.1063/1.5087281.

(25) Evangelisti, L.; Guattari, C.; Asdrubali, F. On the sky temperature models and their influence on buildings energy performance: A critical review. *Energy Build.* **2019**, *183*, 607-625. DOI: 10.1016/j.enbuild.2018.11.037.

(26) Wang, W.; Aleid, S.; Shi, Y.; Zhang, C.; Li, R.; Wu, M.; Zhuo, S.; Wang, P. Integrated solar-driven PV cooling and seawater desalination with zero liquid discharge. *Joule* **2021**, *5* (7), 1873-1887. DOI: 10.1016/j.joule.2021.05.010.

(27) Zhao, L.; Strobach, E.; Bhatia, B.; Yang, S.; Leroy, A.; Zhang, L.; Wang, E. N. Theoretical and experimental investigation of haze in transparent aerogels. *Opt. Express* **2019**, *27* (4), A39-A50. DOI: 10.1364/OE.27.000A39.

(28) Zhang, L.; Xu, Z.; Bhatia, B.; Li, B.; Zhao, L.; Wang, E. N. Modeling and performance analysis of high-efficiency thermally-localized multistage solar stills. *Appl. Energy* **2020**, *266*, 114864. DOI: 10.1016/j.apenergy.2020.114864.

(29) Poredoš, P.; Gao, J.; Shan, H.; Yu, J.; Shao, Z.; Xu, Z.; Wang, R. Ultra-high freshwater production in multistage solar membrane distillation via waste heat injection to condenser. *Nat. Commun.* **2024**, *15* (1), 7890. DOI: 10.1038/s41467-024-51880-y.

(30) Li, S.; Liu, S.; Yang, Q.; Deng, S.; Lin, M. Cover matters: Enhanced performance of multistage solar evaporator with tuned optical and thermal cover properties. *Energy Environ. Sci.* **2024**. DOI: 10.1039/D4EE02710H.

(31) Lu, Z.; Kinefuchi, I.; Wilke, K. L.; Vaartstra, G.; Wang, E. N. A unified relationship for evaporation kinetics at low Mach numbers. *Nat. Commun.* **2019**, *10* (1), 2368. DOI: 10.1038/s41467-019-10209-w.

(32) Smallwood, I. *Handbook of Organic Solvent Properties*. Butterworth-Heinemann: 2012.

(33) Chiavazzo, E.; Morciano, M.; Viglino, F.; Fasano, M.; Asinari, P. Passive solar high-yield seawater desalination by modular and low-cost distillation. *Nat. Sustain.* **2018**, *1* (12), 763-772. DOI: 10.1038/s41893-018-0186-x.

(34) Xu, Z.; Zhang, L.; Zhao, L.; Li, B.; Bhatia, B.; Wang, C.; Wilke, K. L.; Song, Y.; Labban, O.; Lienhard, J. H.; et al. Ultrahigh-efficiency desalination via a thermally-localized multistage solar still. *Energy Environ. Sci.* **2020**, *13* (3), 830-839. DOI: 10.1039/C9EE04122B.

(35) Morciano, M.; Fasano, M.; Boriskina, S. V.; Chiavazzo, E.; Asinari, P. Solar passive distiller with high productivity and Marangoni effect-driven salt rejection. *Energy Environ. Sci.* **2020**, *13* (10), 3646-3655. DOI: 10.1039/D0EE01440K.

(36) Huang, L.; Jiang, H.; Wang, Y.; Ouyang, Z.; Wang, W.; Yang, B.; Liu, H.; Hu, X. Enhanced water yield of solar desalination by thermal concentrated multistage distiller. *Desalination* **2020**, *477*, 114260. DOI: 10.1016/j.desal.2019.114260.

(37) Wang, W.; Shi, Y.; Zhang, C.; Li, R.; Wu, M.; Zhuo, S.; Aleid, S.; Wang, P. Solar Seawater Distillation by Flexible and Fully Passive Multistage Membrane Distillation. *Nano Lett.* **2021**, *21* (12), 5068-5074. DOI: 10.1021/acs.nanolett.1c00910.

(38) Wang, L.; He, Q.; Yu, H.; Jin, R.; Zheng, H. A floating planting system based on concentrated solar multi-stage rising film distillation process. *Energy Convers. Manag.* **2022**, *254*, 115227. DOI: 10.1016/j.enconman.2022.115227.

(39) Wang, L.; Ma, X.; Zhao, Y.; Jin, R.; Zheng, H. Performance study of a passive vertical multiple-effect diffusion solar still directly heated by parabolic concentrator. *Renew. Energy* **2022**, *182*, 855-866. DOI: 10.1016/j.renene.2021.09.074.

(40) Wang, L.; Zheng, H.; Jin, R.; Ma, X.; He, Q. Experimental investigation on a floating multi-effect solar still with rising seawater film. *Renew. Energy* **2022**, *195*, 194-202. DOI: 10.1016/j.renene.2022.06.001.

(41) Tian, Y.; Jiang, Y.; Zhu, R.; Yang, X.; Wu, D.; Wang, X.; Yu, J.; Li, Y.; Gao, T.; Li, F. Solar-Driven Multistage Device Integrating Dropwise Condensation and Guided Water Transport for Efficient Freshwater and Salt Collection. *Environ. Sci. Technol.* **2024**, *58* (17), 7335-7345. DOI: 10.1021/acs.est.3c10450.

(42) Gao, J.; Zhang, L.; You, J.; Ye, Z.; Zhong, Y.; Wang, R.; Wang, E. N.; Xu, Z. Extreme salt-resisting multistage solar distillation with thermohaline convection. *Joule* **2023**, *7* (10), 2274-2290. DOI: 10.1016/j.joule.2023.08.012.
